# Supplementary material for: The vascular niche controls Drosophila hematopoiesis via fibroblast growth factor signaling
Source: eLife. 2021 Jan 4;10:e64672. doi: 10.7554/eLife.64672 (PMC7781598; doi:10.7554/eLife.64672)
Supplement: Figure 1—figure supplement 1—source data 1. [file elife-64672-fig1-figsupp1-data1.xlsx]

## Sheet: hand driver
	hand>			hand>wg-RNAi					hand>wnt2-RNAi					hand>wnt4-RNAi
				VDRC 13352		VDRC 104579			VDRC 38077		VDRC 104338			VDRC 38010		VDRC 104671
	crystal cell index	PSC cell number		crystal cell index	PSC cell number	crystal cell index	PSC cell number		crystal cell index	PSC cell number	crystal cell index	PSC cell number		crystal cell index	PSC cell number	crystal cell index	PSC cell number
	5.39758	40		13.7429	52	3.2733	30		13.7714	69	0.180557	44		18.1204	28	9.08818	16
	8.64278	29		16.3752	30	2.43295	25		6.62358	72	5.60597	68		26.1876	52	18.0157	31
	17.1362	30		40.0614	30	5.306	61		8.46448	40	2.78283	48		28.9434	14	5.86074	24
	33.9372	33		51.2501	36	7.50768	33		8.85902	28	3.31329	68		10.024	22	18.612	26
	22.166	28		56.221	48	21.7955	47		11.2612	36	6.93396	38		18.8021	20	9.21085	40
	10.4556	13		15.3787	61	58.2603	72		6.16876	53	2.6813	53		13.3082	33	12.7568	19
	3.13146	28		14.4029	53	19.6486	31		6.00273	38	7.33864	49		28.0247	37	6.51877	7
	9.3666	41		17.3903	39	29.0911	54		3.23686		4.26862	27		37.0585	14	8.96172	34
	22.1119	46		25.0646	46	8.30824	30							30.9828	16	23.5056	24
	7.61714	41		44.1369	62	59.8502	35							2.875	15	12.8028	16
	6.84994	16		6.30866	29	23.4048	48							39.337	27	0.771334	24
	16.5344	21		7.67345	43	28.41	29							29.0348	24	6.47833	35
	6.95529	35		30.225	53	7.83938	57									24.0191	31
	6.28333	39		42.8079		3.72356										17.8469	21
	12.4505			9.92594		3.26657										10.4518	15
	9.51079			5.31787												7.76033	14
	5.68025			11.9671												12.0111	38
				21.751												8.89319	31
																40.1405	23
																35.8832	31
mean	12.0134	31.4286		23.8889	44.7692	18.8079	42.4615		8.0485	48	4.13814	49.375		23.5582	25.1667	14.4795	25
sem	8.01099	9.84272		16.2473	11.3956	18.8769	14.9589		3.31239	17.0783	2.40634	13.9789		11.0389	11.3124	10.0297	8.84367
	hand>			hand>jelly belly-RNAi					hand>upd1-RNAi
				VDRC 3800		VDRC 103047			VDRC 3282		BL 28722
	crystal cell index	PSC cell number		crystal cell index	PSC cell number	crystal cell index	PSC cell number		crystal cell index	PSC cell number	crystal cell index	PSC cell number
	16.2637	27		23.6942	19	15.7912	23		40.358	20	13.6292	36
	25.1913	20		27.4565	36	31.1515	25		23.8524	36	22.814	49
	33.7307	31		20.3882	46	23.277	29		35.5834	27	62.3426	58
	34.4132	23		17.7168	21	21.3123	35		28.8753	28	66.1866	34
	18.2588	22		38.1831	18	24.1964	13		35.566	26	48.309	46
	8.63105	19		31.6715	13	16.8851	20		35.6727	21	36.049	32
	30.9592	24		17.1616	74	13.0728	27		54.7895	23	65.6885	71
	21.6054	29		20.708	17	34.7528	30		45.8761	44	62.4918	22
	16.0229	28		24.5908	41	42.3294	21		41.4531	45	57.154	52
	24.9985	19		29.8393	31	50.3309	39		26.7534		43.4208	60
	42.9581	23		46.4321	59	57.0013	26		45.3135		40.0455	33
	22.936			30.842	36	39.3496	27		39.7071		40.7253
	39.0324			26.8798	31	40.4922			30.8506		58.4312
	17.9948			25.4378	51	35.4603			72.0379		52.7846
	14.8179			24.9016		23.4726			26.8575		52.5302
	11.3585			3.86492					44.0708		63.94
	15.9014			8.60653					44.8996		34.7885
	14.7137			16.9647					29.351		43.0551
				17.0733					31.5746		27.8121
mean	22.766	24.0909		23.8112	35.2143	31.2583	26.25		38.6022	30	46.9578	44.8182
sem	9.83228	4.13412		9.76669	17.7425	13.0365	6.85068		11.4804	9.46044	15.3318	14.7636
	hand>			hand>wnt5-RNAi					hand>wnt6-RNAi
				VDRC 32257		VDRC 101621			VDRC 26669		BL 104020
	crystal cell index	PSC cell number		crystal cell index	PSC cell number	crystal cell index	PSC cell number		crystal cell index	PSC cell number	crystal cell index	PSC cell number
	31.2	32		7.43804	29	25.3146	32		33.3283	27	33.1153	20
	24.0812	17		12.1746	37	21.7028	39		35.5673	56	38.9104	21
	33.4021	25		33.2449	62	6.87124	33		14.8325	30	47.6324	21
	34.7699	24		21.1797	36	30.6435	59		15.4729	33	38.281	17
	19.2015	31		2.26122	19	6.75368	43		6.87941	19	31.5715	31
	14.8252	38		3.37329	42	9.91695	23		9.9964	27	22.9827	39
	13.5681	30		15.4319	26	30.7927	39		20.9076	23	16.0216	28
	17.497	26		23.1649	29	29.7776	52		9.5302	37	23.4979	19
	24.1507	24		17.4109	45	18.2155	25		5.52775	36	28.3868	46
	34.9809	40		19.6721	36	16.1333	20				26.7313	38
	7.29044	27		18.6835	24	23.3611	39				49.3994	33
	4.34793			15.3912	56	33.9848	40				45.3368	47
				24.662	33	6.81547	26				52.7319	26
				22.6552	40	16.1692	26				56.4938	8
				17.1414	45	7.91014	30				44.4272	27
				21.8157	23		32				21.5694	46
				14.4612	69						42.5957
											39.6685
											36.5452
											47.0762
mean	21.6096	28.5455	#DIV/0!	17.0683	38.2941	18.9575	34.875	#DIV/0!	16.8936	32	37.1488	29.1875
sem	10.583	6.60853	#DIV/0!	7.79608	13.9184	9.81757	10.5822	#DIV/0!	11.0252	10.7355	11.3443	11.5771
	hand>			hand>pvf1-RNAi					hand>pvf2-RNAi					hand>pvf3-RNAi					hand>upd3-RNAi
				VDRC 6173		VDRC 102699			VDRC 7628					VDRC 37933		VDRC 105008			Agaisse et al., 2003
	crystal cell index	PSC cell number		crystal cell index	PSC cell number	crystal cell index	PSC cell number		crystal cell index	PSC cell number				crystal cell index	PSC cell number	crystal cell index	PSC cell number		crystal cell index	PSC cell number
	14.6511	20		47.3134	21	15.1954	31		16.2273	49				20.0535	56	27.827	43		50	16.03
	14.3232	48		26.9713	25	16.9733	31		19.0641	31				22.2439	36	33.1802	25		42	10.6595
	16.0003	19		19.126	25	19.3251	26		17.5574	31				45.9504	60	50.6586	36		31	11.5109
	25.4357	28		32.3311	34	24.3115	33		18.3808	36				45.0647	32	48.7218	47		30	13.0976
	47.6217	27		47.4794	32	28.581	30		20.7942	35				43.9714	26	42.3541	48		30	27.2818
	54.0772	23		47.1172	47	34.3695	24		45.8369	46				43.6524	32	48.6249	23		30	28.8775
	59.255	40		56.8012	27	31.4546	35		34.505	31				39.1378	32	55.7503	30		18	23.0139
	61.61	20		52.9391	28	43.2263	37		23.6684	27				26.8928	24	64.3526	20		41	41.4771
	60.48	25		50.9679	41	51.3829	29		23.6725	40				59.5498	61	49.7701	31		19	42.2366
	41.6583	29		27.1842	44	25.0242	22		25.9197	28				64.2844	42	36.8187	48		22	47.712
	14.375	17		28.812	38	23.2466	34		28.9065	41				36.9586	30	48.2318	40		22	34.1948
	17.1281	42		15.898	39	38.4231	21		14.0311	34				53.9312		57.5054	54		42	51.3387
	15.8333	17		14.6539	26	45.9111	38		30.9792	33				50.6097		49.9983	49		34	36.0946
	16.5741	37		11.4674	42	21.6167	39		42.7612	23				53.7389		45.8589	30		49	4.76819
	23.8803	27		13.3766	30	34.8743	27		13.7337	28						27.2873	37		22	45.6407
	29.5263	21		16.3073	24	50.0729	31		16.3042	48						39.1176	28		49	41.4862
	32.0837	32		23.4605	24	51.0583			38.4221	42						64.932	27		30	44.4043
	34.2313	25		21.3776		42.6354			24.0931	36						51.7481	20		37	15.7
	49.5955	42		33.0131		49.3721			34.6753	40						59.7066	32		41	32.594
	28.3851	31		38.9608		10.8428			18.3921							64.2536	25		32	34.3342
	22.2259	39		26.5085		11.529			35.4256							70.4763	23		35	35.0475
	49.4441	38		47.1155					27.7075							44.1347	43		27	43.8034
	44.3582			28.8252					41.4686							27.7944	31		41	29.1902
	21.8713															32.933			22	25.0054
	21.2146															44.4224			33	23.47
																31.8285				23.3537
mean	32.6336	29.4091	#DIV/0!	31.6525	32.1765	31.8774	30.5	#DIV/0!	26.6316	35.7368			#DIV/0!	43.2885	39.1818	46.8572	34.3478	#DIV/0!	33.16	30.0893
sem	16.2791	9.16858	#DIV/0!	14.1686	8.16422	13.5914	5.47723	#DIV/0!	9.7505	7.34728			#DIV/0!	13.3042	13.6148	12.3721	10.2895	#DIV/0!	9.48103	12.866
	hand>			hand>delta-RNAi					hand>hh-RNAi					hand>wnt10-RNAi
				VDRC 3720		VDRC 37288			VDRC 1402		VDRC 1403			VDRC 100867		BL 31989
	crystal cell index	PSC cell number		crystal cell index	PSC cell number	crystal cell index	PSC cell number		crystal cell index	PSC cell number	crystal cell index	PSC cell number		crystal cell index	PSC cell number	crystal cell index	PSC cell number
	9.24058	31		15.7962	38	40.5261	38		19.6074	44	23.6246	46		30.1333	25	64.9332	49
	11.3586	28		17.7298	40	21.511	44		47.7383	46	59.172	41		13.6905	32	59.9221	73
	53.5635	33		27.2873	34	42.3786	32		51.7321	47	40.1619	20		12.1366	40	59.2668	16
	10.9127	29		34.0075	38	62.1399	28		57.9922	38	23.1177	13		11.8436	24	65.9828	33
	22.3881	39		19.105	13	50.8589	73		5.41083	62	28.6092	14		17.4114	27	45.6517	24
	25.431	25		12.105	13	58.0146	31		5.59319	50	46.4697	27		19.0976	35	58.5256	28
	7.17544	47		13.6492	44	53.5307	41		0.815415	53	47.7782			20.5575	20
	4.04113	24		28.1097	27	54.2999	19		0.453369	52	33.3261			24.5995	47
	22.5926	58		34.0569	25	55.2724	21		0.77941	23	31.6891			66.5616	42
	45.4041	24		48.7434	39				1.39501	47	37.5501			54.2047	23
	29.2038	30		50.8742	41					49	27.193			35.7724	45
	30.461	35		24.3331	49					72				24.3614	36
	37.8293	30		33.4429	51					49				54.383	33
	46.2414	54		44.5669	50					32				41.4517	31
	48.7196	43		10.9457	26					28				9.01093	27
	45.2723	27		38.8285	50									9.30141	39
	14.4036	38		56.3224	26									32.322
	18.4522	46		51.4918	27									50.1364
	26.5726	40		56.051
	34.7907	28
		29
mean	26.9531	33.7642	#DIV/0!	31.5842	33.567	44.0001	32.9979	#DIV/0!	18.9916	43.2402	36.2447	26.8333	#DIV/0!	29.1784	32.1554	51.6889	33.4547
sem	14.7611	10.8259	#DIV/0!	15.1992	12.8228	15.7753	17.1574	#DIV/0!	21.8317	15.0829	11.3198	13.9344	#DIV/0!	17.3895	9.11095	17.5552	19.8815
	hand>			hand>branchless-RNAi					hand>dpp-RNAi					hand>ilp1-RNAi					hand>thisbee-RNAi
				VDRC 5730		VDRC 34572			Pennetier et al., 2012					VDRC 5198		BL 31494			VDRC 24536		BL 102441KK
	crystal cell index	PSC cell number		crystal cell index	PSC cell number	crystal cell index	PSC cell number		crystal cell index	PSC cell number				crystal cell index	PSC cell number	crystal cell index	PSC cell number		crystal cell index	PSC cell number	crystal cell index	PSC cell number
	10.2295	29		86.4878	28	17.5135	39		11.0929	30				4.91506	29	13.4206	17		11.7691	20	0.963531	20
	7.19791	31		63.0541	18	9.29701	19		10.7474	37				34.2057	29	1.50708	26		1.41402	17	1.06358	33
	17.9707	24		95.3921	26	4.10285	16		11.4085	22				46.1968	33	2.71736	24		9.32893	32	14.2698	46
	12.7372	25		111.392	23	1.26582	15		38.7986	31				7.55423	25	11.5188	38		29.5002	28	19.243	24
	24.9309	38		75.0666	38	3.88109	31		33.2648	40				14.9979	19	8.38915	29		43.0914	47	35.4193	33
	28.5788	42		56.0845	51	12.7244	41		8.10644	64				24.6635	18	4.72458	32		5.87376	22	15.4596	36
	30.5627	24		85.0097	45	19.5164	24		7.35399	33				24.3335	26	13.7674	26		17.5519	23	11.0848	35
	37.7663	37		64.8835	43	33.0744	17		6.23252	42				18.2474	33	20.3838	17		8.52446	47	14.8106	23
	40.1131	23		52.8044	17	45.8937	22		11.4306	30				11.9512	33	18.4864	23		8.93092	26	29.7669	33
	20.9224	33		62.4971	24	28.7065	46		6.75893	33				22.516	44	3.71995	22		46.7677	34	35.9507	30
	31.4481	17		44.0283		26.3545	37		13.3203	37				43.8404	16	8.09393	19		28.2772	49	37.7758	36
	33.1828	36				30.8831	44		0.129858	32				43.3259	21				18.1398	32	65.6633	17
	17.0761	22				32.8068			5.12732	27				35.6053	29				23.7763	24	29.1192	36
	10.0049	28				44.564			6.32429	40				6.87163	63				31.0953	42	58.9745	37
	8.72436	23				33.1049			12.3107	25				5.28204	20				53.2411	33	38.7439	17
	8.03326	38							16.0413	48				11.9472	30				25.4175	55	31.7544	24
	5.13799	43							26.7832	32				20.2286	27				13.427	34	24.7054	36
	8.85098								9.91244	34					31				30.1617	19	54.4617	21
									12.7852	30									18.7237	40	51.7268	23
									52.001	43									2.16763	60	48.8492	50
									29.2198	40									36.975	20	52.8086	26
									26.145	31										32	46.6073	21
									18.2876	35											62.7475	20
									6.57784	32
									14.1846	30
									6.28389	36
									11.6477	28
									4.999	37
									5.07752	29
mean	19.6371	30.1765	#DIV/0!	72.4273	31.3	22.9126	29.25	#DIV/0!	14.5639	34.7586			#DIV/0!	22.1578	29.2222	9.70263	24.8182	#DIV/0!	22.1026	33.4545	33.9987	29.4348	#DIV/0!
sem	11.5636	7.78007	#DIV/0!	20.2748	12.019	14.4552	11.7096	#DIV/0!	11.7145	8.00739			#DIV/0!	14.0111	10.8387	6.36972	6.43146	#DIV/0!	14.7171	12.2619	19.2058	8.99407	#DIV/0!
	hand>			hand>ilp2-RNAi					hand>ilp3-RNAi
				VDRC 44761		VDRC 102158			VDRC 9199		VDRC 106512
	crystal cell index	PSC cell number		crystal cell index	PSC cell number	crystal cell index	PSC cell number		crystal cell index	PSC cell number	crystal cell index	PSC cell number
	31.7816	43		35.3471	52	17.077	40		36.6596	65	15.968	34
	40.4432	38		28.2952	60	18.5162	38		42.285	41	29.3656	47
	62.1336	58		46.8273	68	60.6869	45		44.9692	54	47.3641	37
	62.81	51		71.9909	30	50.5198	42		68.0898	59	53.5814	67
	32.3113	40		32.1118	31	59.7341	44		49.4375	63	66.1929	31
	22.6507	29		34.5186	57	47.6554	23		44.0435	40	71.8512	41
	27.3244	50		24.4545	48	38.1477	26		45.4497	41	39.7037	25
	37.0784	45		24.0517	34	37.2088	37		71.7822	33	43.9862	48
	33.8142	40				29.6642	16		60.6786	49	47.6229	52
	24.8255	37				28.1891	44		24.3308	14	49.8364	35
	27.2535	47				48.3407	38		21.7296	50	75.1195	42
	44.2621					65.2428	54		62.465	33	78.3327	35
	18.4213					48.9613	25		41.6368	26	40.6892	50
						31.5882	25		49.3896	29	36.017
						46.8363			41.3999	64	32.1177
						52.7021			22.3987	66
									17.1251	42
									44.0591	38
									65.2795	51
									20.2078	37
									64.0759	23
									42.9809
mean	35.7777	43.4545	#DIV/0!	37.1996	47.5	42.5669	35.5	#DIV/0!	44.567	43.7143	48.5166	41.8462	#DIV/0!
sem	13.8151	7.94183	#DIV/0!	15.8305	14.3825	14.587	10.7471	#DIV/0!	16.315	14.789	17.9164	10.9837	#DIV/0!
	hand>			hand>amalgam-RNAi					hand>boss-RNAi					hand>serrate-RNAi
				VDRC 22944		BL 33416			VDRC 4365		VDRC 4366			VDRC 21172		VDRC 27174
	crystal cell index	PSC cell number		crystal cell index	PSC cell number	crystal cell index	PSC cell number		crystal cell index	PSC cell number	crystal cell index	PSC cell number		crystal cell index	PSC cell number	crystal cell index	PSC cell number
	24.582	44		50.8567	35	40.1821	41		15.5625	25	73.7747	24		58.7057	17	12.7789	51
	4.42645	38		60.7583	51	19.5326	34		34.6773	44	77.1409	26		62.2345	39	20.3854	39
	14.7345	38		23.8785	24	30.3558	28		54.0596	53	47.0068	30		53.5946	55	23.7555	44
	22.4244	38		28.8674	33	0.0936271	34		38.308	41	57.6897	50		66.847	47	21.7554	41
	24.2034	30		31.0706	45	15.4102	19		17.9871	44	71.3239	37		45.9248	50	38.6459	60
	49.1818	48		24.3746	51	41.8821	34		29.086	35	64.2727	35		39.2635	55	33.2247	37
	10.558	43				7.69888	18		51.726	26	65.8835	57		38.9051	32	31.8969	26
	14.3668	38				15.5292	25		44.8203	20	49.792	22		58.4126	34
	31.7816	58				4.5141	47		15.842	40	63.7466	32		41.267	57
	40.4432	51				59.3367	45		53.9556	25	51.8572	25		51.3177	40
	62.1336	40				59.1312	40		33.7274	28	65.0377	36		53.8062	56
	62.81	29				39.87	53		42.5069	43	72.7664	45		46.8612	64
	32.3113	50				49.1015	24		66.524	52	65.7416	23		39.7293
	22.6507	45				41.432	26		58.5318	13	46.6547	46		40.8967
	27.3244	40				63.9258	37		53.2773	23	61.1882	25		36.9228
	37.0784	37				70.5331	35		40.0459	58	39.8305	19
	33.8142	47				58.7613	30		37.7567	42	57.7491	50
	24.8255					0.0177952	36		28.4703	47	65.6001	45
	27.2535					6.62947	13		40.4032	32	65.891	47
	44.2621					58.7644	27		35.6605	42	50.8663	41
	18.4213					54.4118			45.7145	31	81.6627	44
									46.4063	35	55.7459	30
									27.9617	29	57.1711	40
									42.7528	33	37.7544	27
									35.0129	34	22.5236	38
									61.0081	56	56.3301	41
									58.0776		49.1084
									43.4494		18.9537
									33.4682		26.9549
mean	29.9803	42	#DIV/0!	36.6343	39.8333	35.1006	32.3	#DIV/0!	40.9234	36.5769	55.8627	35.9615	#DIV/0!	48.9792	45.5	26.0632	42.5714	#DIV/0!
sem	15.3655	7.44144	#DIV/0!	15.4178	10.9255	23.5197	10.1572	#DIV/0!	13.1526	11.4828	15.5756	10.3169	#DIV/0!	9.61415	13.4401	8.90912	10.7836	#DIV/0!
	hand>			hand>eiger-RNAi					hand>screw-RNAi					hand>torso like-RNAi
				VDRC 45253		VDRC 108814			VDRC 21400		VDRC 105303			VDRC 14429		VDRC 14430
	crystal cell index	PSC cell number		crystal cell index	PSC cell number	crystal cell index	PSC cell number		crystal cell index	PSC cell number	crystal cell index	PSC cell number		crystal cell index	PSC cell number	crystal cell index	PSC cell number
	26.0949	38		6.54091	24	86.4293	43		13.0027	64	1.9388	26		39.829	41	63.5673	67
	52.3692	44		9.73917	34	72.5241	24		20.9138	48	53.3811	32		51.7558	27	62.7849	43
	17.1176	33		1.3177	35	20.7939	24		18.2229	63	3.1574	27		51.1391	39	51.7216	34
	30.4446	33		27.4709	50	39.7964	45		29.4822	38	3.11164	43		47.4394	30	73.0865	35
	15.3185	32		21.4481	74	69.457	53		32.5869	19	32.6934	27		37.748	43	70.3434	35
	19.7682	37		26.9474	30	66.2462	41		2.53961	44	40.4582	30		38.28	42	63.6436	33
	43.5548	27		15.0924	17	53.0592	30		2.52693	104	43.909	22			33	58.1311	19
	29.3605	24		23.2467	55	57.5613	40		71.9705	73	16.2424	35				79.5951	40
	12.8707	57		52.4016	66	62.9297	26		45.4067	37	19.9593	23				46.4114	39
	22.9399	50		40.8079	41	69.4662	20		36.8688	38	22.798	23				45.29	36
	41.8993	27		26.9441	67	67.0764	36		66.034	20	43.3888	30				81.7582	37
	41.3307	34		0	53	32.4614	49		21.5467	35	54.1462	37				61.6527	34
	11.9229	42		0	36	83.9028	26		32.3562	48						86.7469	34
	9.65429	47				70.9752	32		35.9435	63						89.1706	36
	15.6218	40				58.4586	27		12.6382	74						52.1153	38
	23.8093	62				49.7946	39		5.41761	77						56.7693	64
	1.78071	18				50.9942	32										20
						71.295	26										69
						58.3888	24										69
						85.2051	20
						54.8253	25
						68.256	17
						32.6197	31
						25.5824	27
						41.9311
						31.0123
mean	24.4622	37.9412		19.3813	44.7692	56.9632	31.5417		27.9661	52.8125	27.932	29.5833		44.3652	36.4286	65.1742	41.1579
sem	13.8297	11.6161		16.0788	17.6123	18.4293	9.65032		20.5302	22.7221	19.4016	6.33114		6.50157	6.37331	13.7979	15.0269
	hand>			hand>spazle2/DNT1-RNAi					hand>spazle5/DNT2-RNAi					hand>fat-RNAi					hand>Gbb-RNAi					hand>Gurken-RNAi					hand>spitz-RNAi					hand>späzle3-RNAi					hand>späzle4-RNAi					hand>späzle6-RNAi					hand>späzle-RNAi
				VDRC 108894					VDRC 41295		VDRC 102389			BL 29566		BL 34970			BL 34898					VDRC 3122		VDRC 4332			VDRC 3920		VDRC 103817			VDRC 102871					VDRC 7679					VDRC 18823		VDRC 100897			VDRC 7571
	crystal cell index	PSC cell number		crystal cell index	PSC cell number				crystal cell index	PSC cell number	crystal cell index	PSC cell number		crystal cell index	PSC cell number	crystal cell index	PSC cell number		crystal cell index	PSC cell number				crystal cell index	PSC cell number	crystal cell index	PSC cell number		crystal cell index	PSC cell number	crystal cell index	PSC cell number		crystal cell index	PSC cell number				crystal cell index	PSC cell number				crystal cell index	PSC cell number	crystal cell index	PSC cell number		crystal cell index
	11.0816	17		1.01387	25				48.3054	51	23.4612	37		7.53604	43	38.2177	25		5.87712	33				8.44714	29	15.2365	12		5.82753	46	27.3818	29		8.09221	32				11.2424	85				29.8786	53	37.1705	17		10.1825
	6.89651	22		2.51915	37				55.1649	51	25.9093	12		12.049	49	51.9947	26		3.4086	47				15.2454	31	37.8207	49		5.85652	45	11.1895	29		3.40964	51				13.2669	76				29.9365	35	27.0074	44		18.6905
	18.6495	27		2.61154	26				56.7293	61	44.3206	30		6.28165	12	30.9668	33		4.56343	19				6.57332	35	28.5297	23		13.0212	23	33.0118	20		5.72949	42				13.1173	22				30.2599	56	15.8844	46		4.3587
	8.06526	31		0.886355	25				61.4643	38	43.0064	13		14.6247	12	19.8149	23		3.9402	16				21.2361	44	12.0845	29		13.7871	25	8.36384	51		7.95247	36				8.50251	83				15.648	53	13.989	36		10.1124
	13.3289	40		1.35535	42				46.7455	39	36.851	53		2.00693	33	26.9071	17		2.5338	20				4.73573	34	31.6902	21		11.8536	30	46.8286	36		4.77144	22				22.2077	68				8.92879	29	26.5128	23		32.4831
	30.2601	21		18.8091	26				36.2655	51	39.3457	32		8.05045	27	43.4556	31		4.23758	31				3.34736	26	22.3088	29		8.67006	29	42.0894	25		2.89654	43				18.5114	71				19.7706	50	14.5116	42		26.5363
	25.4959	36		27.0053	30				69.2156	32	48.8854	17		8.3177	52	29.5622			11.7213	24				9.41011	32	19.3531	35		9.61019	26	19.9829	39		9.11783	41				4.02178	105				13.2262	67	36.5891	38		4.68252
	15.2484	26		19.0045	44				33.6511	51	36.7499	24		6.40615	23	62.8117	15		10.0635	21				0.53717	16	22.4677	46		14.8961	25	12.4864			6.86645	25				8.30944	55				52.2854	45	21.8048	36		5.83111
	13.3958	29		5.1511	23				36.7881	33	44.0714	28		18.0476	19	37.1951	15		8.89939	30				0.277924	22	35.1116	20		2.78974	28	45.6737			1.9345	29				16.5098	80				32.1652	78	25.2175	36		3.57766
	10.4796			4.9027	51				48.924	49	40.0664	26		14.1054	28	11.006	41		4.57308	21				1.16314	35	32.5	24		4.14079	35	27.7928	46		1.3976					12.4864	78				23.1684	40	22.2527	17		5.90404
	20.9898			11.4542	21				34.3133	41	18.034	50		27.184	31	9.27811	30							5.15634	37	11.8742	27		26.9766	52	45.6825	30							21.4277	43				8.78908	68	16.2769	21		6.47584
	29.4984			14.439					15.0322	59	29.7792	44		20.1373	41	8.01224								2.30696	29	7.90416	40		20.4716	31	35.2919	21							9.08939	26				34.9782	30	31.5695	33		9.10521
				2.98709	25				20.0264	52	53.1047	29		13.1971	19	24.002	39							2.21223	25	10.8337	43		11.2528	35	28.4221	35							6.1636	49				18.7136	44	22.5119	32		12.2947
				6.53865	61				9.53259	47	51.0981	19		32.9531	27	5.80392	15							0.72122	17				9.3158	26	26.71	36							15.4326	91				47.351	53	23.7783	21		8.47823
				2.99816	23				12.4438	41	41.3965	13		12.1229	23	16.3363	29								32				17.0592	52	28.134	29							12.5937					20.8311	64	9.16407	39
				4.71896	42				24.1879	40	62.4021	17		4.39512	34														8.67264	37	24.9682	27							13.3741	30				26.277	76	21.7756	48
				3.3903	24				13.1078	28	49.2105	44		9.03649	15														1.49709	31	21.5898	21							3.51669	32				29.0614	20		60
				2.90473	14						55.6261	18		19.2386	35														24.74	16	26.3375	31							6.18555	23				36.3396	33		46
				5.79909	51						26.9731	27		2.39947	32														8.35123	26	13.438	32							5.29837	51				14.4318	45		32
				2.29325	24						16.224	39																	2.82073		6.78454	33							6.02769	50					21
				1.04818	30						43.5554	34																	4.5816	35									5.72949	53					39
					39						30.365	25																	0.924035	46									0.444913	68
																													9.37816	39
																													5.93793	26
mean	16.9491	27.6667		6.75384	32.5238				36.5822	44.9412	39.1107	28.6818	#DIV/0!	12.531	29.2105	27.6909	26.0769		5.98181	26.2				5.81216	29.6	22.1319	30.6154		10.1013	33.2174	26.608	31.6667		5.21682	35.6667				10.6118	59				25.8969	47.5714	22.876	35.1053	#DIV/0!	11.3366
sem	8.0443	7.31437		7.19813	12.1187				18.7078	9.38397	12.2552	12.0095	#DIV/0!	8.17826	11.5786	16.8543	8.88314		3.12415	9.24722				6.11585	7.50999	10.1901	11.2067		6.90742	9.62457	12.3718	8.18176		2.752	9.46044				5.86491	24.1516				11.8993	16.7498	7.90282	11.5465	#DIV/0!	8.7081
	hand>			hand>activinB-RNAi					hand>dawdle-RNAi					hand>maverick-RNAi					hand>myoglianine-RNAi
				VDRC 12174		VDRC 108663			VDRC 105309		BL 34974			BL 34650		BL 36809			BL 31200		BL 33132
	crystal cell index	PSC cell number		crystal cell index	PSC cell number	crystal cell index	PSC cell number		crystal cell index	PSC cell number	crystal cell index	PSC cell number		crystal cell index	PSC cell number	crystal cell index	PSC cell number		crystal cell index	PSC cell number	crystal cell index	PSC cell number
	16.9263	37		7.47778	57	0.61081	30		30.5742	26	14.1398	30		10.2577	52	24.3513	41		32.9715	33	14.8343	37
	8.60838	33		14.6648	44	0.329086	27		30.3702	52	6.6482	31		16.4266	21	5.8208	35		27.5176	35	24.1177	58
	26.1899	24		13.983	52	21.7179	32		17.5314	31	15.1495	17		13.8276	37	15.2494	39		11.0992	47	7.84054	28
	22.9142	46		26.0053	34	23.0266	37		30.5615	33	10.8869	23		19.4792	38	7.53928	34		31.097	7	5.05768	29
	23.6426	37		17.2372	39	6.48228	23		29.8972	21	10.4359	32		14.9509	36	35.1359	44		29.5812	18	48.073	41
	4.9282	25		53.9289	61	8.1262	15		58.4157	36	4.47387	24		22.2331	29	41.3824	34		10.6957	31	35.2126	37
	3.63212	39		37.3725	30	6.16832	19		35.3397	31	20.3283	34		29.3485	46	14.2079	44				48.627	31
	1.53526	15		34.9053	19	8.49822	35		25.8148	49				58.1159	34	16.3669	33				20.781	32
	6.76145	22		45.5173	67	26.3641	21		26.5451	43				8.6201	22	10.1493	29				4.57972	26
	1.23215	34		51.1743	26	47.0382	32		18.2797	24				41.6271	12	9.36068	45				7.83171	22
	8.61291	30		22.9327	43	24.6879	21		28.3791	28				24.757	30	30.7462	37				25.1846	32
	22.5831	33		62.3751	26	18.1721	7		23.278	26				19.1569	16	21.1003	36				40.8464	26
	11.1073	29		42.6298	36	7.95793			12.7054	32				34.378	28	46.3481	46				21.9224	46
	5.19156	32		27.5804	41	49.8515			22.4321	26				24.8477	22	21.7418	35				1.37386	21
	17.2852			49.2145	44	26.4481			22.8285	18				26.9233	28	24.1659	32				12.8179	21
				47.5155	23	52.172			33.0002	38				20.6905	36	8.40845	18				29.9792	41
				71.3901	43				50.9486	42				36.5833	27	33.6854	40				36.7206	34
				64.5814	33				38.4459	22				19.0284	68	13.4368	18				46.9452	44
				52.3969	27				47.982	38				36.1084	49	40.4327	36				39.7451	27
				22.2825	39				35.7458	33				35.818	35	19.101					36.6723	73
				58.6028					62.0677	15				54.7868	45						47.5987	58
				29.2816	24				37.3454	29					38
									24.2396	21					13
									14.6681	37					46
									28.3441						47
															41
mean	12.0767	31.1429	#DIV/0!	38.775	38.4762	20.4782	24.9167	#DIV/0!	31.4296	31.2917	11.7232	27.2857	#DIV/0!	27.046	34.4615	21.9365	35.5789	#DIV/0!	23.827	28.5	26.5124	36.381
sem	8.71452	7.87261	#DIV/0!	18.3254	12.9523	16.9868	8.87753	#DIV/0!	12.5705	9.41543	5.35867	6.1023	#DIV/0!	13.3588	13.0299	12.3127	7.77686	#DIV/0!	10.1748	14.025	16.0437	13.511
	hand>			hand>ds-RNAi
				VDRC 36219		VDRC 28008
	crystal cell index	PSC cell number		crystal cell index	PSC cell number	crystal cell index	PSC cell number
	1.30557	42		36.4061	25	27.5353	22
	7.35347	19		23.1837	23	19.3246	40
	7.92802	29		27.322	34	16.7544	42
	5.11359	50		22.3821	23	32.1569	25
	11.3668	43		17.4578	31	22.1784	43
	11.9717	25		30.9085	22	14.9414	35
	13.6459	34		27.6581	29	14.531	45
	11.1969	42		39.6944	27	16.2904	39
	13.6809	20		36.8993	19	14.0964	26
	12.1682	41		13.6228	29		29
	2.08361	42		22.0358	25
	47.6168	37		30.1377	15
	16.9263	33		13.8676	15
	8.60838	42		30.2803	26
	47.5415	24		11.4356	33
	26.1899	46		16.2079	13
	22.9142	37		25.083	29
	23.6426	25		27.9782	29
	4.9282	39		40.2834	17
	3.63212	15		34.3934	24
	1.53526	22		17.9306	36
	6.76145	34			19
	1.23215	30			43
	8.61291	33			30
	22.5831	29
	11.1073	32
	5.19156
	17.2852
mean	13.3616	33.2692	#DIV/0!	25.9604	25.6667	19.7565	34.6
sem	11.9382	9.11069	#DIV/0!	8.77796	7.24519	6.36284	8.42219
	hand>			hand>ilp4-RNAi					hand>ilp5-RNAi					hand>ilp6-RNAi					hand>ilp7-RNAi					hand>ilp8-RNAi
				VDRC 105516		VDRC 49520			VDRC 105004		VDRC 49520			VDRC 45218		VDRC 102465			VDRC 105024					VDRC 9420		VDRC 102604
	crystal cell index	PSC cell number		crystal cell index	PSC cell number	crystal cell index	PSC cell number		crystal cell index	PSC cell number	crystal cell index	PSC cell number		crystal cell index	PSC cell number	crystal cell index	PSC cell number		crystal cell index	PSC cell number				crystal cell index	PSC cell number	crystal cell index	PSC cell number
	34.5863	44		20.4542	47	21.6825	28		30.3654	72	21.6825	28		36.3979	45	28.59	39		25.1418	22				13.0082	29	19.3024	46
	32.7241	45		20.1058	30	21.0172	19		26.4732	72	21.0172	19		48.4443	22	40.2505	46		48.0979	42				20.1643	44	36.3586	38
	33.4835	28		12.9789	45	19.7896	31		43.5283	34	19.7896	31		15.6008	66	10.0994	44		56.3535	66				31.7396	49	29.3234	37
	24.4028	24		59	50	15.5636	26		17.3009	40	15.5636	26		42.403	49	16.646	47		21.2102	42				28.7321	63	26.709	19
	30.3196	16		66	49	67.3825	38		22.2637	56	67.3825	38		57.857	32	41.5323	52		32.3055	22				52.1398	37	23.9598	41
	32.9031	25		17.0585	49	14.3187	23		19.8243	49	14.3187	23		59.9504	42	30.6797	58		27.9585	37				31.09	30	14.7826	51
	24.0006	47		23.2266	55	7.56289	41			57	7.56289	41		19.1045	60	37.5408	51		27.5411	30				21.5622	40	17.9168	59
	21.5642	36		31.89	55	21.6799	37			50	21.6799	37		15.8473	91	22.8483	45		55.6515	32				49.6332	42	20.3919	34
	51.467	22		21.1867	28	6.43999	50				6.43999	50		8.55262	22	50.2962	20		29.1091	39				41.0109	36	28.027	46
	37.6962	9		30.461	45	22.6038	27				22.6038	27		27.2081	62	21.6138	68		60.1808	16				45.9263	49
	28.5662	31		43.281	45	28.175	33				28.175	33		30.7042	39	51.3722	22		36.8664	28				36.5099	35
	13.2088	23		33.7655		19.1179	35				19.1179	35		49.5352	78	39.0188	36		28.5903	27					61
	72.2475	33		9.98852		54.8493	57				54.8493	57		12.4626	53	16.9776	39		26.5992	5					39
	47.3237	63				39.6227	26				39.6227	26		33.1801	67	26.9308	48			16
	43					43.9457	20				43.9457	20		37.5784	49	26.688	36
	34					40.4033	34				40.4033	34		22.5382	51	39.6665	37
	25.8847	40				29.6805	18				29.6805	18		35.1703	27	17.3553	27
	31.0995	44				55.4985	30				55.4985	30		24.3318	41	36.8819	36
	31.2407	22				29.3915					29.3915			39.9439	48	27.3165	25
	24.8458													33.8306	54	34.8811	34
	21.4496													43.3637	67	18.6082	23
	27.7832													29.7799	93	39.9471	21
														35.4348	59	27.2473	35
														38.8882	66	25.6771	27
														59.7295	61	31.9653	38
														38.3038	96	33.2802	38
														34.7526		28.0455
mean	32.8999	32.4706	#DIV/0!	29.9536	45.2727	29.4066	31.8333	#DIV/0!	26.626	53.75	29.4066	31.8333	#DIV/0!	34.4775	55.3846	30.4428	38.1538	#DIV/0!	36.5851	30.2857			#DIV/0!	33.7742	42.6154	24.0857	41.2222
sem	12.346	13.5005	#DIV/0!	17.082	8.79876	16.7777	10.3256	#DIV/0!	9.50733	13.6146	16.7777	10.3256	#DIV/0!	13.7403	19.9561	10.2527	11.8985	#DIV/0!	13.5557	14.8709			#DIV/0!	12.6439	10.5478	6.72323	11.3554
[truncated: 8 more columns]

## Sheet: NP1029 driver
	NP1029>			NP1029> activinB-RNAi VDRC 12174			NP1029>boss-RNAi VDRC 4366			NP1029> branchless-RNAi VDRC 5730			NP1029> dawdle-RNAi VDRC 105309			NP1029>eiger-RNAi VDRC 108814			NP1029>pvf3-RNAi VDRC 105008			NP1029> torso like-RNAi VDRC 14430			NP1029>hh-RNAi VDRC 1403
	crystal cell index	PSC cell number		crystal cell index	PSC cell number		crystal cell index	PSC cell number		crystal cell index	PSC cell number		crystal cell index	PSC cell number		crystal cell index	PSC cell number		crystal cell index	PSC cell number		crystal cell index	PSC cell number		crystal cell index	PSC cell number
	14.3	36		10.557	31		34.3503	50		9.5028	71		13.1924	26		23.172	27		20.8073	34		56.7966	42		27.9937	82
	21.5511	43		5.88117	74		17.6303	42		17.5194	42		12.1204	44		14.2552	41		23.9473	23		16.3155	50		24.1645	66
	15.7817	34		8.59688	34		27.1738	32		24.1637	42		16.2216	45		11.5009	42		27.764	18		9.89364	61		40.2445	34
	20.8432	49		27.3496	54		23.1291	23		25.3067	23		13.4697	40		8.53655	33		6.04854	49		76.7082	34		23.6246	87
	11.5842	29		21.6704	41		22.6917	21		10.3679	36		9.82063	35		12.465	59		8.81827	25		69.9385	40		1.74912	71
	11.7049	50		6.56469	41		13.2882	31		14.1464	58		13.0912	36		13.1509	28		38.3726	41		65.1093	35		9.61373	30
	15.4955	49		35.3676	50		16.3033	36		20.3601	53		35.3166	36		12.9926	41		36.4119	50		59.0871	27		59.172	61
	14.4243	29		8.95258	60		21.1911	70		26.5211	109		11.502	25		14.1503	37		24.1739	19		4.74548	11		40.1619	62
	10.5995	23		10.6477	50		22.087	38		29.6246	37		24.9151	29		10.8637	49		17.4078			20.4544	17		4.33201	29
	8.56742	21		16.0456	44		19.2799	37		42.5887	37		7.06104	22		24.2305	35		9.68382			39.8048	37		1.42143
	16.1616	36		8.43236	25		14.1788	50		7.89096	42		5.27541	27		12.7953	29		20.3766			37.6869	39		23.1177
	8.61232			5.65073	32		21.619	52		47.7001	46		5.69337	35		10.3704	54		15.4723			44.912	37		5.24148
	8.28288			14.1883	86		13.3891	28		26.1802	40		23.6419	24		9.5801	42		14.94			49.4041	38		8.89792
	2.50078			8.79701	40		19.2527	25		12.1451	64		19.5713	34		13.0376	32		5.484				50		28.6092
	23.1496			7.70821	64		27.357	35		11.2139	36		34.2219	37		12.5709	45		36.9497				28		46.4697
	24.8478			25.2647			24.2001	30		26.7043	36		22.9856	25		13.5791	27		11.8749				35		47.7782
	7.78224			17.3423			14.7544	45		37.6161			30.8657	17		9.33136	33		15.5143						13.555
	10.9002			53.6325			9.4354	42		13.3788			12.018	24		21.8285	35		9.43786						33.3261
	20.0503			16.131			11.7754	31		23.9373			7.77			16.4226	37		14.4891						9.12684
	6.38689			27.8988			15.9765	43		23.5984			30.2684			23.3198	34		41.474						31.6891
	1.6601			23.8095			7.97578	36		20.9866			16.9201			8.57921	34		30.9065						37.5501
	4.04771			26.1705			20.441	53		15.0516			16.0352			20.6038	31		18.0627						27.193
	2.58197			6.65913			13.1151			21.5361			10.4522			10.0393	27		22.8442						0
	18.9312			11.8149			36.0072			24.455			14.0536			16.4399	17		22.5597						0
	12.565			19.9087			24.4172			25.1789			10.3628			18.2709	39		19.0288						0
	17.4402			3.42686			7.5268			31.6024			17.6943			11.5567			16.0592
	11.8351			12.4365			19.542			23.7837			8.76313			10.0922
	15.9406			25.6299			16.209			25.5731			16.766			8.04716
	18.0685			4.17643			26.5451						16.4916			9.97748
	6.83465						9.68288						20.0291			8.52841
	21.2827						23.9727									30.0642
	22.0853						7.97734									11.4651
	2.44992															16.6176
	1.06827
	19.1144
	24.4242
	9.23297
	5.63331
	12.2865
	11.9987
	21.3022
	11.996
	26.2325
	6.32551
	12.7889
mean	13.1478	36.2727	#DIV/0!	16.2314	48.4	#DIV/0!	18.8273	38.6364	#DIV/0!	22.8084	48.25	#DIV/0!	16.553	31.1667	#DIV/0!	14.195	36.32	#DIV/0!	20.3427	32.375	#DIV/0!	42.3736	36.3125	#DIV/0!	21.8013	58
sem	13.1222	36.2975	#DIV/0!	16.4271	49.56	#DIV/0!	18.3423	38.1198	#DIV/0!	23.2836	46.8281	#DIV/0!	16.665	31.4537	#DIV/0!	13.923	36.6928	#DIV/0!	20.3248	32.1719	#DIV/0!	41.2641	35.957	#DIV/0!	21.5536	55.3333
	NP1029>			NP1029>upd1-RNAi BL28722			NP1029> upd1-RNAi VDRC 3282			NP1029> upd2-RNAi BL 33949			NP1029> upd2-RNAi BL 33988			NP1029> upd3-RNAi (Agaisse et al., 2003)			NP1029>wnt6-RNAi VDRC 104020			NP1029>wnt10-RNAi BL 31989			NP1029> serrate-RNAi VDRC 27174
	crystal cell index	PSC cell number		crystal cell index	PSC cell number		crystal cell index	PSC cell number		crystal cell index	PSC cell number		crystal cell index	PSC cell number		crystal cell index	PSC cell number		crystal cell index	PSC cell number		crystal cell index	PSC cell number		crystal cell index	PSC cell number
	11.5422			13.1205			32.7067			10.6842			25.703			34.9958			13.826			24.3181			3.99401
	14.9495			8.56537			24.5494			22.3044			20.3118			36.5718			12.1303			10.9386			7.15262
	22.2069			41.9677			36.6515			10.0223			21.3188			34.1317			12.6636			4.19158			11.9902
	14.418			47.9141			41.195			18.0044			37.8812			15.6559			19.1259			38.4357			5.11531
	15.2668			8.81153			18.3378			14.4623			21.3915			51.8863			11.6657			23.39			4.43273
	15.262			11.2446			18.0355			6.5125			35.1545			43.3313			18.1467			28.316			8.4475
	8.0806			6.58555			13.8753			16.3403			11.8949			5.35218			12.623			28.2689			15.1604
	18.0431			9.91347			17.4935			28.1759			20.3325			40.6222			14.4592			6.03615			5.16918
	8.97937			37.3019			38.5813			11.0285			30.5608			21.3585			14.0794			18.1087			6.56401
	8.03039			29.0046			23.6999			22.7104			20.5238			41.6248			14.916			8.18724			9.38353
	16.1314			30.7934			16.8284			16.0569			25.5631			12.8925			39.6021			10.4704			10.9158
	8.71721			39.2636			14.4836			19.1614			19.242			14.1094			29.1236			6.68208
	6.00021			11.4796			10.8149			10.7134			22.4157			28.2845			42.107			20.9896
	19.3652			13.0475			24.3955			14.0061			15.311			27.2303						13.0803
	4.46532			18.5426			16.6208						24.0108			10.9268
	1.20564			18.1684			18.8156									16.1017
	0.360966			11.1716			23.4598
	8.71222			16.1786			35.1292
	20.6921			12.5936			8.1919
	18.4266			19.0319			12.4559
	13.6761			36.7169
	2.85451			26.3639
	5.49742			35.4025
	17.5279			38.0792
	16.2139			11.426
mean	11.865			22.1075			22.3161			15.7274			23.441			27.1922			19.5745			17.2438			8.02957
sem	11.865			22.1075			22.3161			15.7274			23.441			27.1922			19.5745			17.2438			8.02957

## Sheet: hand driver tep4
	hand>		hand> torso-like-RNAi VDRC 1430		hand> eiger-RNAi VDRC 108814
	tep4 index		tep4 index		tep4 index
	15.9423		0.010411		4.28965
	11.3742		0.0358197		6.24919
	15.7007		0.0346065		4.88387
	11.0959		0.034302		5.42086
	14.3433		0.0321309		5.79922
	12.2739		0.0132307		6.09147
	14.5401		0.0898816		8.82648
	14.3287		0.0342214		2.76415
	13.0714		0.0141049		10.5297
			0.0530192		7.79757
			0.0302332		0.105555
			0.00434344
			0.440666
			0.205145
			0.0972144
			0.0409499
			0.0368977
			0.0536912
			0.0715743
			0.0515942
			0.0169459
			0.0330083
mean	13.6301		0.0651814		5.70525
sem	1.77205		0.093986		2.83928
	hand>		hand> wnt6-RNAi VDRC 104020
	tep4 index		tep4 index
	4.48255		10.026
	4.45331		4.78353
	19.192		9.96705
	13.9654		6.60287
	17.7509		14.4182
	3.0749		14.2491
	4.41896		8.87161
	16.0004		9.16622
	12.7489		11.2112
	5.32719		14.2253
	9.37464		2.53677
	2.43799		3.19517
	4.30827
	11.6642
mean	9.22854		9.10441
sem	5.88617		4.15603
	hand>		hand> hh-RNAi VDRC 1403		hand> wnt10-RNAi BL31989
	tep4 index		tep4 index		tep4 index
	11.6154		0.0610962		8.91924
	20.7562		0.0516117		15.0138
	26.7185		0.100773		13.0126
	9.34988		0.0106786		10.1308
	16.7734		0.0514229		24.2472
	12.754		0.00988903		5.89941
	19.6571		0.03577		6.09169
	22.9017		0.0074419		1.40173
	11.3645		0
	5.60985		0
			0.0169114
			0.0353352
			0.0382129
			0.010707
			0.0488945
			0.0744251
			0.282271
			0.0891913
			0.0330326
			0.00947584
mean	15.75		0.048357		10.5896
sem	6.68262		0.0623348		6.98591
	hand>		hand> pvf3-RNAi VDRC 105008		hand> upd3-RNAi (Agaisse et al., 2003)
	tep4 index		tep4 index		tep4 index
	34.043		10.2852		14.5669
	32.3219		16.5814		22.8894
	23.9826		16.0666		18.1277
	34.1273		24.1868		33.1467
	33.8477		20.6779		31.932
	30.3895		19.3976		20.8709
	22.3405		11.9964		28.3572
	26.5055		8.0557
	30.8287		24.3831
	26.5856		16.3179
	39.1725
	36.069
	24.3246
	16.5198
mean	29.3613		16.7949		24.2701
sem	6.21625		5.54429		7.06571
	hand>		hand> serrate-RNAi VDRC 27174		hand> upd2-RNAi BL 33949		hand> boss-RNAi VDRC 4366		hand> branchless-RNAi VDRC 5730
	tep4 index		tep4 index		tep4 index		tep4 index		tep4 index
	29.601		0		5.73389		2.41976		0
	30.3467		0		6.50038		7.37104		0
	19.8409		0		2.6607		2.64335		10.5771
	21.6146		0		0.846224		5.72238		15.8654
	4.65403		0		0.770048		3.35259		9.90219
	10.8545		0		0.81667		3.05607		15.7734
			0		1.60377		2.94095		9.59691
			0				0.0332567		10.559
			0						0
			0						0
			0						14.431
			0						12.4992
			0						16.9754
			0						11.9836
									0.00667286
									0
									11.6171
									15.3713
mean	19.4853		0		2.70453		3.44242		8.6199
sem	10.1923		0		2.43443		2.21514		6.61581
	hand>		hand> upd1-RNAi BL28722
	tep4 index		tep4 index
	16.6922		0.358564
	18.9634		0.262699
	21.3432		0.947857
	23.1629		0.113733
	32.4504		0.423948
	36.7084		0.183036
	50.3585		0.448431
	62.1534		0.644904
	50.287		0.214917
	45.1399		0.227074
	32.9965		0.282019
	35.4939		0.827806
	24.2312		0.471364
	20.4294		0.954228
	34.4754
	33.8283
	34.4754
	24.5204
	19.1648
mean	32.4671		0.454327
sem	12.4972		0.283477
	hand>		hand> dawdle-RNAi VDRC 105309		hand> activinB-RNAi VDRC 12174
	tep4 index		tep4 index		tep4 index
	31.3534		40.4376		0.720959
	35.5486		21.5163		0.107745
	42.7579		19.3213		0.0807881
	38.9471		31.4556		0.167024
	26.1112		30.3668		0.0923719
	31.1021		16.5791		0.0713686
	40.9631		21.7999		0.0545848
	33.7987		21.4484		0
	38.3851		26.5906		0.163758
	32.6613		25.8008		0.145991
	22.4387		29.6088		0
	25.3657		41.2934		0.0111779
	24.3004				0.149252
					0
mean	32.5949		27.1849		0.126073
sem	6.62938		7.85985		0.181962
