# Supplementary material for: The vascular niche controls Drosophila hematopoiesis via fibroblast growth factor signaling
Source: eLife. 2021 Jan 4;10:e64672. doi: 10.7554/eLife.64672 (PMC7781598; doi:10.7554/eLife.64672)
Supplement: Figure 1—source data 1. — Crystal cells were labeled by BcGFP, PSC cells were immune-stained with Antp antibody, and to visualize the core progenitors tep4 in situ hybridization was performed. In most cases, 2 RNAi lines were tested per ligand, and at least 15 lymph glands per RNAi were analyzed. Crystal cell index and PSC cell number were established. The green and red colored boxes indicate an increase and a decrease, respectively, compared to the control. Black dashes indicate that no difference was observed compared to the control. A white box indicates that this condition was not tested. Most RNAi lines that gave a modification in crystal cell index with the handΔ-gal4 driver were also analyzed with another cardiac cell driver NP1029-gal4, and proPO antibody immunostainings were performed to visualize crystal cells. Finally, for all RNAi lines that led to a defect in crystal cell differentiation with the handΔ-gal4 driver, tep4 in situ hybridizations were performed and the tep4 index was established. [file elife-64672-fig1-data1.xlsx]

## Sheet: Fig1e
	hand>	hand>ilp6-RNAi
	44	45
	45	22
	28	66
	24	49
	16	32
	25	42
	47	60
	36	91
	22	22
	9	62
	31	39
	23	78
	33	53
	43	67
	34	49
	40	51
	44	27
	22	41
	42	48
	19	54
	29	67
	50	93
	43	59
	25	66
	34	61
	42	96
	20
	41
	42
	37
	33
	42
	24
	46
	37
	25
	39
	15
	22
	34
	30
	33
	29
	32
	29
	31
	24
	25
	38
	42
	24
	37
	23
	33
	17
	36
	22
	28
	23
	38
	43
mean	31.8689	55.3846
SEM	9.3318	19.9561

## Sheet: Fig1f
	hand>	hand>ilp6-RNAi
	34.5863	36.3979
	32.7241	48.4443
	33.4835	15.6008
	24.4028	42.403
	30.3196	57.857
	32.9031	59.9504
	24.0006	19.1045
	21.5642	15.8473
	51.467	8.55262
	37.6962	27.2081
	28.5662	30.7042
	13.2088	49.5352
	47.3237	12.4626
	25.8847	33.1801
	31.0995	37.5784
	31.2407	22.5382
	24.8458	35.1703
	21.4496	24.3318
	27.7832	39.9439
		33.8306
		43.3637
		29.7799
		35.4348
		38.8882
		59.7295
		38.3038
		34.7526
mean	30.2395	34.4775
SEM	8.86617	13.7403

## Sheet: Fig1h
	hand>	hand>ds-RNAi
	44	25
	45	23
	28	34
	24	23
	16	31
	25	22
	47	29
	36	27
	22	19
	9	29
	31	25
	23	15
	33	15
	43	26
	34	33
	40	13
	44	29
	22	29
	42	17
	19	24
	29	36
	50	19
	43	43
	25	30
	34
	42
	20
	41
	42
	37
	33
	42
	24
	46
	37
	25
	39
	15
	22
	34
	30
	33
	29
	32
	29
	31
	24
	25
	38
	42
	24
	37
	23
	33
	17
	36
	22
	28
	23
	38
	43
mean	31.8689	25.6667
SEM	9.3318	7.24519

## Sheet: Fig1i
	hand>	hand>ds-RNAi
	1.30557	36.4061
	7.35347	23.1837
	7.92802	27.322
	5.11359	22.3821
	11.3668	17.4578
	11.9717	30.9085
	13.6459	27.6581
	11.1969	39.6944
	13.6809	36.8993
	12.1682	13.6228
	2.08361	22.0358
	16.9263	30.1377
	8.60838	13.8676
	26.1899	30.2803
	22.9142	11.4356
	23.6426	16.2079
	4.9282	25.083
	3.63212	27.9782
	1.53526	40.2834
	6.76145	34.3934
	1.23215	17.9306
	8.61291
	22.5831
	11.1073
	5.19156
	17.2852
mean	10.7294	25.9604
SEM	7.28347	8.77796

## Sheet: Fig1k
	hand>	hand>pvf3-RNAi
	44	43
	45	25
	28	36
	24	47
	16	48
	25	23
	47	30
	36	20
	22	71
	9	31
	31	48
	23	40
	33	54
	43	49
	34	30
	40	37
	44	28
	22	27
	42	20
	19	32
	29	25
	50	23
	43	43
	25	31
	34
	42
	20
	41
	42
	37
	33
	42
	24
	46
	37
	25
	39
	15
	22
	34
	30
	33
	29
	32
	29
	31
	24
	25
	38
	42
	24
	37
	23
	33
	17
	36
	22
	28
	23
	38
	43
mean	31.8689	35.875
SEM	9.3318	12.5397

## Sheet: Fig1l
	hand>	hand>pvf3-RNAi
	14.6511	27.827
	14.3232	33.1802
	16.0003	50.6586
	25.4357	48.7218
	47.6217	42.3541
	54.0772	48.6249
	59.255	55.7503
	61.61	64.3526
	60.48	49.7701
	41.6583	36.8187
	14.375	48.2318
	17.1281	57.5054
	15.8333	49.9983
	16.5741	45.8589
	23.8803	27.2873
	29.5263	39.1176
	32.0837	64.932
	34.2313	51.7481
	49.5955	59.7066
	28.3851	64.2536
	22.2259	70.4763
	49.4441	44.1347
	44.3582	27.7944
	21.8713	32.933
	21.2146	44.4224
		31.8285
mean	32.6336	47.4584
SEM	16.2791	12.3721

## Sheet: Fig1o
	hand>	hand>pvf3-RNAi
	34.043	10.2852
	32.3219	16.5814
	23.9826	16.0666
	34.1273	24.1868
	33.8477	20.6779
	30.3895	19.3976
	22.3405	11.9964
	26.5055	8.0557
	30.8287	24.3831
	26.5856	16.3179
	39.1725
	36.069
	24.3246
	16.5198
mean	29.3613	16.7949
SEM	5.99013	5.25978
