# Supplementary material for: The vascular niche controls Drosophila hematopoiesis via fibroblast growth factor signaling
Source: eLife. 2021 Jan 4;10:e64672. doi: 10.7554/eLife.64672 (PMC7781598; doi:10.7554/eLife.64672)
Supplement: Figure 1—source data 2. [file elife-64672-fig1-data2.xlsx]

## Sheet: Feuil1
signaling pathway	ligand	RNAi reference	HandΔ-Gal4		NP1029-Gal4		HandΔ-Gal4		signaling pathway	ligand	RNAi reference	HandΔ-Gal4		NP1029-Gal4		HandΔ-Gal4
			PSC	crystal cells	PSC	crystal cells	tep4					PSC	crystal cells	PSC	crystal cells	tep4
Wg	Wg	VDRC 13352	-	-					Insulin	Ilp1	VDRC 5198	-	-
		VDRC 104579	-	-							BL 31491	-	-
	Wnt2	VDRC 38077	-	-						Ilp2	VDRC 44761	-	-
		VDRC 104338	-	-							VDRC 102158	-	-
	Wnt4	VDRC 38010	-	-						Ilp3	VDRC 9199	-	-
		VDRC 104671	-	-							VDRC 106512	-	-
	Wnt5	VDRC 32257	-	-						Ilp4	VDRC 105516	-	-
		VDRC 101621	-	-							BL 31377	-	-
	Wnt6	VDRC 26669	-	-						Ilp5	VDRC 49520	-	-
		VDRC 104020	-	↗	-	-	↘				VDRC 105004	-	-
	Wnt10	VDRC 100867	-	-						Ilp6	VDRC 45218	↗	-
		BL 31989	-	↗	-	-	↘				VDRC 102465	-	-
Hedgehog	hh	VDRC 1402	-	↗						Ilp7	VDRC 49127	-	-
		VDRC 1403	-	↗	-	↗	↘				VDRC 105024	-	-
Notch	Ser	VDRC 27174	-	↗	-	↗	↘			Ilp8	VDRC 9420	-	-
		VDRC 27172	-	-							VDRC 102604	-	-
	delta	VDRC 3720	-	-					Hippo	Fat	BL 29566	-	-
		VDRC 27172	-	-							BL 34970	-	-
Neurotactin	amalgam	BL 33416	-	-						Ds	BL 28008	↘	↗
		VDRC 22944	-	-							VDRC 36219	-	-
Alk	jelly belly	VDRC 30800	-	-					BMP/dpp	dpp	Pennetier et al., 2012	-	-
		VDRC 103047	-	-						Gbb	BL 34898	-	-
JAK/STAT	upd1	BL 28722	-	↗	-	↗	-			Screw	VDRC 21400	-	-
		VDRC 3282	-	↗							VDRC 105303	-	-
	upd2	BL 33949	-	↗	-	↗	↘		Toll	spatzle	VDRC 7571	-	-
		BL 33988	-	↗							BL 28538	-	-
	upd3	Agaisse et al., 2003	-	↗	-	↗	-			spatzle2/ DNT1	VDRC 26115	-	-
PDGF/PVR	pvf1	VDRC 6173	-	-							VDRC 108894	-	-
		VDRC 102699	-	-						spatzle3	VDRC 102871	-	-
	pvf2	VDRC 7628	-	-						spatzle4	VDRC 7679	↗	-
		VDRC 7629	-	-						spatzle5/ DNT2	VDRC 41295	-	-
	pvf3	VDRC 37933	-	-							VDRC 102389	-	-
		VDRC105008	-	↗	-	↗	↘			spatzle6	VDRC 18823	-	-
Sevenless	boss	VDRC 4365	-	-							VDRC 100897	-	-
		VDRC 4366	-	↗	-	↗	↘		EGFR	Gurken	VDRC 3122	-	-
torso	torso-like	VDRC 14429	-	-							VDRC 4332	-	-
		VDRC 14430	-	↗	-	↗	↘			Vein	VDRC 50358	-	-
TNFα	eiger	VDRC 45253	-	-							VDRC 109437	-	-
		VDRC 108814	-	↗	-	-	↘			spitz	VDRC 3920	-	-
FGF	thisbe	VDRC 24536	-	-							VDRC 103817	-	-
		VDRC 102441	-	-					TGFβ	Activinβ	VDRC 12174	-	↗	-	-	↘
	branchless	VDRC 5730	-	↗	-	↗	↘				VDRC 108663	-	-
		BL 34572	-	-						dawdle	VDRC 105309	-	↗	-	-	↘
Ephrin	Eph	VDRC 4771	-	-							BL 34974	-	-
		VDRC 110448	-	-						maverick	BL 36809	-	-
											BL 34650	-	-
										myoglianine	VDRC 33132	-	-
Figure1-figure supplement 2											BL 31200	-	-
