# Supplementary material for: The vascular niche controls Drosophila hematopoiesis via fibroblast growth factor signaling
Source: eLife. 2021 Jan 4;10:e64672. doi: 10.7554/eLife.64672 (PMC7781598; doi:10.7554/eLife.64672)
Supplement: Figure 2—figure supplement 1—source data 1. [file elife-64672-fig2-figsupp1-data1.xlsx]

## Sheet: sup Fig2h
	hand>	hand>bnl-RNAi
	4.75567	4.78641
	7.30405	1.21558
	2.71678	7.6913
	5.64024	7.59206
	6.261	18.5272
	3.91931	9.81643
	2.52836	11.8745
	2.98866	1.94995
	1.70712	3.59792
	1.43509	5.05204
	5.68993	22.9844
	2.33958	10.6572
	2.94164	4.56496
	4.49006	6.87658
	5.36491	6.55458
	5.40247	13.0327
		13.092
mean	4.0928	8.81563
sem	1.7632	5.79392

## Sheet: sup Fig2k
	hand>	hand>bnl-RNAi
	4.84982	5.54808
	5.98801	13.8297
	1.47795	12.0534
	4.62554	15.9136
	2.84673	22.4092
	10.1844	25.2049
	13.1994	42.6912
	17.1933	31.6486
	0.435242	16.6347
	0.752716	14.1019
	10.1858	11.6436
	8.89724	18.7327
	12.453	30.8619
	5.96905	33.4541
	4.36793	9.62618
	4.81306	2.9734
	3.86901	13.3009
	8.46332	19.3318
	4.23975	16.1896
	12.495	18.5246
	3.86451	25.2507
	5.57368	12.3398
	0.701486	12.5874
	0.238354
mean	6.15351	18.4718
sem	4.56691	9.47201

## Sheet: sup Fig2n
	NP1029>	NP1029>bnl-RNAi
	14.3	9.5028
	21.5511	17.5194
	15.7817	24.1637
	20.8432	25.3067
	11.5842	10.3679
	11.7049	14.1464
	15.4955	20.3601
	14.4243	26.5211
	10.5995	29.6246
	8.56742	42.5887
	16.1616	2.56138
	8.61232	7.89096
	8.28288	47.7001
	2.50078	26.1802
	23.1496	12.1451
	24.8478	11.2139
	7.78224	26.7043
	10.9002	37.6161
	20.0503	13.3788
	6.38689	23.9373
	1.6601	23.5984
	4.04771	20.9866
	2.58197	15.0516
	18.9312	21.5361
	31.2709	24.455
	12.565	25.1789
	17.4402	31.6024
	11.8351	23.7837
	15.9406	25.5731
	18.0685
	6.83465
	21.2827
	22.0853
	2.44992
	1.06827
	19.1144
	24.4242
	9.23297
	5.63331
	12.2865
	11.9987
	21.3022
	11.996
	26.2325
	6.32551
	12.7889
mean	13.5418	22.1102
sem	7.31862	10.1462

## Sheet: sup Fig2q
	hand> ; tub80ts	hand>bnl-RNAi ; tub80ts
	16.137	18.201
	0.957	37.422
	1.278	13.419
	5.913	17.958
	5.268	26.856
	7.167	45.504
	17.559	17.067
	11.856	17.091
	16.089	43.431
	11.625	16.593
	7.764	18.606
	14.7	7.146
	6.51	20.31
	0.609	15.228
	0.405
	4.758
	2.628
	19.638
	22.545
	0.48
mean	8.694	22.49
sem	1.582	3.086
