# Supplementary material for: The vascular niche controls Drosophila hematopoiesis via fibroblast growth factor signaling
Source: eLife. 2021 Jan 4;10:e64672. doi: 10.7554/eLife.64672 (PMC7781598; doi:10.7554/eLife.64672)
Supplement: Figure 2—figure supplement 2—source data 1. [file elife-64672-fig2-figsupp2-data1.xlsx]

## Sheet: sup Fig3c
	dome>	dome>bnl-RNAi
	1.85637	5.64947
	4.31048	4.07886
	3.02502	7.47295
	6.55795	4.98657
	5.82469	10.0357
	0	13.1687
	0	0.876033
	0	0
	0.648824	3.5468
	2.48924	7.76614
	0	0
	0.93779	0
	1.60776	2.81474
	0	0.519915
	0.759971	0
	0	0
	0	0
	0	5.9319
	0	3.10165
	0	9.03475
	0	0
	0	1.11096
	0	1.22046
	0	0.672549
		7.79341
		2.56649
mean	1.16742	3.55185
sem	1.93437	3.76391

## Sheet: sup Fig3f
	dome>	dome>bnl-RNAi
	10.057	0.221054
	4.88928	1.80149
	9.32482	2.13364
	4.9345	0.144212
	12.0285	4.38861
	6.02098	4.06453
	11.8812	4.01725
	6.27546	2.51385
	5.7193	1.3856
	13.574	0.132637
	10.2369	0.536712
	7.79228	1.11986
	1.56047	0.796062
	7.46799	0.235934
	8.44668	1.52174
	7.95417	2.10236
	7.76108	0.759357
	7.83992	0.742862
	10.208	1.65494
	5.54473	0.687557
	3.96703	1.62379
	2.80558	1.89901
	0.581092	0.0295359
		0.325733
mean	7.25526	1.4516
sem	3.32367	1.27055

## Sheet: sup Fig3i
	hand>	hand>bnl-RNAi	hand>bnl	hand>bnl ; bnl-RNAi
	16.1759	2.98244	50.942	30.6058
	9.42068	12.8153	60.2041	41.1375
	30.9512	2.56612	38.916	39.9727
	30.3796	1.6251	58.2588	28.9521
	32.2322	32.1446	49.2518	21.837
	33.8855	25.3416	51.5706	34.1818
	39.3736	6.2054	42.7377	1.13032
	45.6912	6.00286	60.5344	1.41628
	21.0221	28.9357	58.896	15.9556
	22.2503	22.001	31.1699	11.4379
	33.1854	2.69767	38.1243
	41.3999
	11.6709
mean	28.2799	13.0289	49.146	22.6627
sem	11.3581	11.8055	10.1466	14.7686

## Sheet: sup Fig3l
	hand>	hand>bnl-RNAi
	33	26
	31	30
	20	20
	25	23
	35	16
	35	32
	25	25
	15	31
	20	41
	10	35
	17	35
	16	9
	29	44
	22	27
	10	42
	29	43
	35	26
	12	34
	20	37
	23	14
	35	22
	14	22
	26
	26
	26
	34
	34
	16
	12
	12
	31
	19
	22
	23
	25
	38
	14
	31
	38
	22
	21
	29
	34
	19
	25
	16
	34
	29
	39
mean	24.6122	28.8182
sem	8.28356	9.64926

## Sheet: sup Fig3o
	hand>	hand>bnl-RNAi
	1746.08	669.949
	2786.09	3152.68
	960.969	1796.81
	2152.66	2217.62
	2709.53	1597.65
	2360.73	917.177
	2544.1	881.286
	4097.46	2136.98
	5457.55	5216.76
	4484.44	773.66
	2781.41	1730.07
	2231.18	2237.93
	1626.45	3340.2
	2147.01	2082.21
	4375.82	1769.14
	2859.25	2621.87
	2491.37	963.074
	4365.48	2491.5
	860.128	901.286
	3043.63	1179.62
	3408.37	960.251
	3869.58	664.134
	3748.16
	1633.09
	1289.83
	1193.03
	2398.13
	2766.41
	3773.43
	1216.22
	1453.06
	2023.1
	695.732
	777.808
	1770.04
	2432.02
	1484.22
	892.063
	395.699
	1375.76
mean	2366.93	1831.9
sem	1217.51	1100.99
