# Supplementary material for: The vascular niche controls Drosophila hematopoiesis via fibroblast growth factor signaling
Source: eLife. 2021 Jan 4;10:e64672. doi: 10.7554/eLife.64672 (PMC7781598; doi:10.7554/eLife.64672)
Supplement: Figure 2—source data 1. [file elife-64672-fig2-data1.xlsx]

## Sheet: Fig2d
	white	bnlP2/+
	3.22709	12.4975
	13.6489	20.5045
	1.73789	15.5393
	4.41915	15.5404
	16.3486	46.7254
	6.86032	46.8016
	14.2136	64.1347
	18.6325	48.9746
	9.11857	43.0505
	0
	11.246
	2.40444
mean	8.48809	34.8632
SEM	6.27856	18.9057

## Sheet: Fig2i
	hand>	hand>bnl-RNAi	hand>bnl	hand>bnl; bnl-RNAi
	22.4052	33.9733	6.40622	7.97539
	30.8138	36.9909	5.97333	19.3239
	15.139	30.3041	5.23283	44.4386
	14.8853	31.1401	2.4363	17.6854
	8.18831	35.6033	22.2342	6.6636
	6.80782	26.2361	15.9199	6.16374
	7.43191	34.5766	7.73778	30.6619
	15.8433	59.662	7.9148	18.7914
	1.81911	31.7884	16.8115	18.2641
	1.62402	35.3432	4.49338	14.0028
	1.86442	37.6524	16.5248
	1.5169	65.839	7.85145
	4.76167	51.872	0.404331
	53.9079		1.06405
	22.309		1.93513
	24.9348		1.83194
	27.8452		1.88063
	2.9246		2.9915
	2.02103		3.50795
	12.5519		3.31033
	25.7246		4.01257
	4.06973		4.03903
	41.6502		6.0083
	13.1667		4.42813
	26.4807		4.08333
	13.9606		6.5987
	13.2795		6.16809
	32.3738		6.48869
	19.9431		11.5223
	29.5833		6.88655
	12.6329		7.87702
	11.7175		0.532915
	36.6731		0.675653
	3.35902		1.56974
	6.42797		7.25838
			10.0297
			16.4988
			13.5098
			8.88514
			3.07328
			26.6076
			16.8187
			1.77031
			3.29086
			9.61923
			5.08309
			5.07183
			13.2466
			11.8784
			4.651
mean	16.3039	39.3063	7.29292	18.3971
SEM	12.9455	12.0403	5.82064	11.7633

## Sheet: Fig2l
	hand>	hand>bnl-RNAi
	10.5726	12.8459
	13.5722	13.7191
	9.27248	8.62202
	23.8151	3.0554
	22.9767	4.79619
	9.74861	6.66405
	7.66775	8.33751
	14.8824	4.85082
	14.5232	4.1905
	11.8162	7.03172
	15.3538	14.395
	11.6539	4.56635
	11.6539	2.25502
	8.13225	1.76526
	5.99401	2.60405
	10.6454
	8.66246
	8.2468
	9.99354
	13.7153
	11.1759
	13.6451
	6.11073
	7.07019
mean	11.7042	6.64659
SEM	4.50795	4.18125

## Sheet: Fig2o
	hand>	hand>bnl-RNAi
	33.4425	4.42706
	29.9797	3.51316
	14.45	3.42671
	17.9926	1.33569
	13.6377	3.59997
	28.8314	3.66232
	30.8872	2.4041
	26.304	0.887566
	19.2387	1.28825
	30.5579	1.4326
	8.09079	2.84339
	7.1195	9.16373
	9.63352	3.88959
	11.619	4.57749
	32.6582	0.618429
	23.6158	2.55288
	8.82003	0.5697
	14.1031	1.55763
	17.183	0.0861096
	11.6274	0.038373
	6.98123	1.69926
	25.1107	1.63212
	13.9888	1.11278
	27.5307	1.36585
	31.7348	0.0638459
		3.35656
		6.13568
		2.71093
mean	19.8055	2.49828
SEM	9.18712	2.01919

## Sheet: Fig2r
	hand>	hand>bnl-RNAi
	7.93549	2.49886
	7.44738	5.47699
	4.67556	2.35992
	7.17983	3.06033
	11.9439	5.1611
	16.35	3.79028
	13.9338	3.79028
	6.6618	7.39499
	8.15284	8.61822
	14.4128	2.67472
	20.2766	3.25675
	7.99671	0.641379
	12.296	2.50041
	23.227	1.36917
	21.2578	1.15467
	9.3907	0.762918
	8.82625	1.24401
	3.79742	1.40952
	4.97948	8.26542
	20.0367	9.13301
	17.2244	1.86183
	6.90469	3.81375
	14.7795
	20.9352
	7.23299
	6.1025
	2.16782
	2.38235
	13.0859
	10.0477
	9.47319
	29.2261
	20.3636
	0.751721
	3.12781
	10.2064
mean	11.2442	3.64721
SEM	6.83221	2.62177

## Sheet: Fig2u
	hand>	hand>bnl-RNAi
	4.63611	4.31875
	3.4858	3.66636
	4.78714	6.11758
	6.11835	3.65965
	7.42804	4.37979
	11.4745	4.79984
	4.2337	8.19941
	5.10469	6.88991
	6.53892	4.98379
	8.11284	3.97465
	4.37774	1.43711
	4.20223	1.69624
	5.9652	1.45098
	6.93963	1.5655
	14.7653	8.29876
	10.9856	4.75624
		4.03557
		3.71088
mean	6.822	4.33
sem	0.7852	0.4919
