# Supplementary material for: The vascular niche controls Drosophila hematopoiesis via fibroblast growth factor signaling
Source: eLife. 2021 Jan 4;10:e64672. doi: 10.7554/eLife.64672 (PMC7781598; doi:10.7554/eLife.64672)
Supplement: Figure 3—figure supplement 1—source data 1. [file elife-64672-fig3-figsupp1-data1.xlsx]

## Sheet: sup Fig3f
	hand>	hand>btl-RNAi
	24.1957	15.341
	7.66005	17.7194
	12.2326	9.28734
	2.75676	4.10441
	21.7164	28.0515
	21.56	32.5247
	2.72877	2.35971
	6.78146	3.33593
	27.2166	18.2287
	21.5504	10.9656
	7.03683	4.51285
	7.33859	22.81
	4.63347	34.4313
	18.1418	12.3177
	4.37516	7.27552
	28.7259	2.15596
	1.34781	35.6791
	7.02817
	10.9064
	19.6041
	6.44023
	16.3485
	24.2101
mean	13.2407	15.3589
sem	8.82084	11.6315

## Sheet: sup Fig3i
	hand>	hand>btl-RNAi
	29.9797	4.7262
	14.45	12.1021
	17.9926	18.8246
	13.6377	24.0809
	28.8314	11.9952
	30.8872	4.03438
	26.304	10.717
	19.2387	13.0164
	30.5579	21.4983
	8.09079	20.485
	7.1195	5.40752
	9.63352	1.55776
	11.619	5.43657
	32.6582	15.4651
	23.6158	17.3473
	8.82003	29.7126
	14.1031	12.5419
	17.183	22.6499
	11.6274	21.8354
	6.98123	12.2859
	25.1107	16.6419
	13.9888	13.5308
	27.5307	8.16062
	31.7348	10.294
	2.74739	8.05692
	3.37726	8.52143
	27.9463	5.33987
	20.6348	7.43627
	10.1212	4.12693
	8.35111	18.3374
	14.353	10.9443
	10.0285	13.1555
	7.47765	19.8545
	5.33771	16.4195
	10.4288
	8.31688
	7.41796
	5.77093
	5.20917
	4.34907
	7.92473
	10.7632
	8.22577
	11.8462
	3.89716
	1.86969
	3.22003
	9.30159
	11.0898
	5.31417
mean	13.7403	13.1335
sem	9.06732	6.7661

## Sheet: sup Fig3l
	dome>	dome>btl-RNAi
	0.446882	3.07534
	1.89695	3.21591
	2.80117	1.98265
	2.31615	2.73399
	2.21623	4.0023
	1.93743	4.95651
	4.90834	6.22341
	1.09242	7.61519
	4.00454	5.07483
	2.80791	11.381
	6.57082	4.04629
	3.57226	8.74966
	1.88688	4.56338
	1.21748	4.01449
	2.51349	4.56008
	5.62016	10.5555
	5.55345	5.2178
	3.14468	3.15786
	1.40566	9.76696
	2.57529	6.26238
	6.05466	6.69786
	4.48557	3.69102
	7.21006
	5.87546
	1.44378
	2.48067
mean	3.30917	5.52475
sem	1.89641	2.62468

## Sheet: sup Fig3o
	dome>	dome>btl-RNAi
	28	41
	24	34
	8	29
	29	20
	19	27
	24	25
	24	38
	16	48
	19	21
	18	35
	22	23
	19	13
	18	22
	29	14
	17	9
	32	25
	29	24
	14	30
	22	36
	10	16
	33	21
		33
		20
mean	21.619	26.2609
sem	6.84453	9.59743
