# Supplementary material for: The vascular niche controls Drosophila hematopoiesis via fibroblast growth factor signaling
Source: eLife. 2021 Jan 4;10:e64672. doi: 10.7554/eLife.64672 (PMC7781598; doi:10.7554/eLife.64672)
Supplement: Figure 3—source data 1. [file elife-64672-fig3-data1.xlsx]

## Sheet: Fig3d
	white	btldev1/+
	15.4063
	15.4979	44.8171
	0	5.74482
	0	5.62099
	1.12053	0.447209
	7.60628	7.28682
	6.65608	0.807852
	3.46302	7.50604
	4.97373	1.06518
	3.07696	17.6823
	9.25588	23.4385
	12.9746	24.9238
	0.615385	27.0429
	2.01372	4.26764
	2.55201	0.710068
	1.10625	29.0868
	1.83274	6.79063
	6.04411	4.9552
	8.68385	22.1039
	5.90304	46.5277
	1.71535	24.689
	13.598	4.3785
	15.4063	0
	15.4979	4.38587
	0	41.3214
	0	13.3354
	1.12053	21.6179
	7.60628	3.70199
	6.65608	25.9177
	3.46302	10.8506
	4.97373	8.04138
	3.07696	49.2427
	9.25588	0
	12.9746	48.131
	0.615385	24.7381
	2.01372	27.5877
	2.55201	54.7098
	1.10625	0
	1.83274	17.1841
	6.04411	28.9584
	8.68385	15.2986
	5.90304	74.2493
	1.71535	40.9409
	13.598	13.396
		49.1567
		70.9564
		38.6315
		0
		33.4676
		14.8063
mean	5.64071	21.2351
SEM	4.97126	19.3045

## Sheet: Fig3g
	dome>	dome>btl-RNAi	hand>btlCA	hand>btlCA; btl-RNAi
	13.0197	44.033	0	57.096
	56.1974	61.6567	0	59.4455
	56.2475	65.9501	16.5921	55.0996
	58.5657	30.3575	2.24856	60.4991
	53.1296	37.567	11.6044	38.7358
	31.7996	32.8454	42.1688	15.1449
	52.2229	37.5936	4.79365	22.772
	47.9643	26.3739	12.6093	18.1777
	15.5312	37.9385	22.9188	25.9539
	40.626	36.4842	8.04735	23.3397
	35.419	22.9921	46.6627	14.4437
	20.6003	54.3564	13.1474	11.9111
	28.1062	22.2835		17.9865
	45.5075	51.7244		36.4951
	26.3421	47.7768		16.1912
	16.6984	28.8614		56.8676
	9.32882			33.9068
	27.1331
	24.9205
	21.5799
	3.19395
	8.47256
	8.7937
	6.57846
	16.5
	4.21155
	5.72181
	8.76937
	15.1232
	14.9377
	39.9449
	23.7946
	16.0654
	4.37029
	12.7726
	65.8411
	30.3476
	12.6036
	0
	10.8661
	31.6541
	19.5737
	20.8568
	7.79418
	14.0669
	26.6564
	8.05728
	31.2678
	11.2746
	15.7017
	19.7276
	62.3653
	60.5095
	13.4728
	56.2779
	36.54
	3.18235
	28.6131
	31.5517
	45.069
	47.5828
	28.0628
	49.8802
	32.8828
	10.6195
	31.4876
	54.1059
	0
	23.7218
	13.4304
	48.5119
	20.0445
	25.5086
	43.1962
	15.5774
	57.916
	22.7934
	29.5282
	29.904
	28.8015
	47.4473
	45.8764
	22.5274
	38.9952
	39.4557
	30.3928
	19.456
mean	27.4916	39.9247	15.0661	33.1804
SEM	16.9955	13.2866	15.3494	18.0671

## Sheet: Fig3j
	dome>	dome>btl-RNAi
	3.03857	0.756647
	1.92832	5.33242
	29.635	5.75178
	52.8313	2.58146
	43.988	8.80084
	5.94875	12.0364
	12.2257	0.397373
	43.9382	0.141912
	45.1145	26.4544
	31.6787	0.220488
	27.7146	10.6592
	5.55625	13.1704
	5.70637	14.2815
	27.7739	15.3968
	18.4413	0.43966
	7.95977	1.69551
	8.31082	4.49564
	1.00787	0.995787
	2.25978	1.45558
	33.6284	7.5358
	36.6339	6.95224
	31.6083
	35.5085
	8.14135
	6.88417
	36.233
	42.7497
mean	22.4609	6.64532
SEM	16.6626	6.79481

## Sheet: Fig3m
	dome>	dome>btl-RNAi
	18.6004	0.594101
	15.334	5.37086
	17.7128	0.127398
	19.9081	1.33297
	13.8018	7.53079
	9.06706	7.2175
	8.99949	13.5614
	7.60405	12.8867
	11.3541	6.73613
	6.4599	6.94969
	13.8685	5.59495
	2.95791	6.47611
	5.71882	0.940735
	12.5674	0.888285
	7.65719	1.44387
	11.7268	1.86097
	14.7841	5.44254
	7.93368	1.73899
	5.06288	7.34025
	10.3189	7.53772
		5.46549
		3.48724
		13.5698
		5.45178
mean	11.0719	5.39776
SEM	4.719	3.9776

## Sheet: Fig3p
	dome>	dome> htlDN	dome> btl-RNAi	dome> htlDN > btl-RNAi
	4.69	0.31	3.86	1.82
	5.75	0	8.77	3.89
	5	0.39	12.26	2.61
	0.43	1.28	4.87	3.35
	1.65	0.5	10.57	4.42
	2.58	2.4	6.43	1.75
	6.75	3.55	1.68	10.27
	1.25	1.84	1.86	3.97
	4.73	3.79	4.96	6.04
	7.13	3.45	12.28	4.02
	6.01	0	2.89	2.74
	3.6	3.86	6.51	4.86
	2.1	4.26	10.12	6.53
	1.01		9.56	4.57
	2.24		15.98	7.58
	1.7		6.49	0.81
			12.93	12.01
			12.92	2.19
				4.65
				2.93
				3.07
				5.73
				4.11
				11.05
				11.43
				6.08
				9.56
				3.02
				5.36
mean	3.539	1.82	8.052	5.187
sem	0.5478	0.4694	1.006	0.569
