# Supplementary material for: The vascular niche controls Drosophila hematopoiesis via fibroblast growth factor signaling
Source: eLife. 2021 Jan 4;10:e64672. doi: 10.7554/eLife.64672 (PMC7781598; doi:10.7554/eLife.64672)
Supplement: Figure 4—figure supplement 1—source data 1. [file elife-64672-fig4-figsupp1-data1.xlsx]

## Sheet: sup Fig4c
	hand>	hand>sar1-RNAi
	24	47
	31	48
	25	36
	26	15
	18	37
	27	36
	26	33
	22	40
	23	20
	21	23
	17	21
	16	29
	18	27
	29	33
	21	20
	20	31
	24	20
	27	19
	14	35
	19	16
	26	26
	15	19
	19	20
	16	32
	16	21
	23	37
	14	17
	7	25
	20
	23
	22
	25
	18
	14
	18
	19
	19
mean	20.5946	27.9643
sem	4.98029	9.24755

## Sheet: sup Fig4f
	NP1029>	NP1029>sar1-RNAi
	13	35
	12	23
	17	27
	17	26
	7	16
	23	16
	15	18
	17	31
	15	18
	17	19
	20	29
	19	17
	15	25
	20	29
	27	15
	20	22
	15	13
	7	32
	29	30
	26	33
		32
		28
		21
		32
		20
		21
		25
		32
mean	17.55	24.4643
sem	5.81717	6.47778

## Sheet: sup Fig4i
	NP1029>	NP1029>sar1-RNAi
	8.0672	7.50181
	8.06461	8.53688
	7.37283	6.68888
	4.98178	7.44139
	1.14631	12.2103
	0.84064	12.986
	7.45453	6.47464
	0.130524	7.85661
	0.126083	12.5306
	2.6021	12.9817
	1.46355	8.35829
	8.88878	7.41462
	5.02769	5.84726
	8.77965	5.40808
	7.64229	6.90456
		10.2044
		13.4278
		7.02522
		4.80618
		4.38764
		9.87565
		13.6822
		7.51354
		4.25993
		12.3981
		6.94842
		8.64021
		10.3434
mean	4.83924	8.66623
sem	3.42608	2.90811
