# Supplementary material for: The vascular niche controls Drosophila hematopoiesis via fibroblast growth factor signaling
Source: eLife. 2021 Jan 4;10:e64672. doi: 10.7554/eLife.64672 (PMC7781598; doi:10.7554/eLife.64672)
Supplement: Figure 4—source data 1. [file elife-64672-fig4-data1.xlsx]

## Sheet: Fig4g
	hand>
Intervals	1	2	3	4	5	6	7	8	9	10	11	12
	14	34	40	37	14	12	7	8	5	7	25	27
	23	5	7	24	12	27	17	11	9	9	12	22
	17	11	11	14	15	12	19	10	18	12	7	3
	18	13	13	11	13	8	24	6	11	3	12	4
mean	18	15.75	17.75	21.5	13.5	14.75	16.75	8.75	10.75	7.75	14	14
sem	1.871	6.316	7.521	5.867	0.6455	4.191	3.568	1.109	2.72	1.887	3.851	6.151
hand> sar1-RNAi
Intervals	1	2	3	4	5	6	7	8	9	10	11	12
	12	16	15	14	9	8	7	2	4	5	11	3
	39	24	42	30	31	26	20	20	22	18	16	13
	15	9	8	0	4	3	2	3	5	1	1	2
	10	4	0	4	5	1	2	1	1	3	3	0
	24	8	9	3	3	3	8	8	7	9	10	21
	10	19	19	8	2	2	3	12	4	5	3	10
mean	18.33	13.33	15.5	9.833	9	7.167	7	7.667	7.167	6.833	7.333	8.167
sem	4.652	3.095	5.926	4.49	4.509	3.894	2.805	2.996	3.07	2.482	2.404	3.28

## Sheet: Fig4k
	hand>	hand>sar1-RNAi	hand>sar1-RNAi; bnl::GFP
	38.922	100.233	8.78705
	38.3002	57.7292	8.6496
	21.0115	65.1921	15.4592
	16.5868	52.3314	9.30189
	9.60245	32.502	3.02827
	8.57608	26.584	8.37962
	5.5081	27.4169	14.4713
	7.86051	3.28555	1.93778
	1.31353	26.449	32.966
	16.9732	8.9806	6.41475
	9.94594	26.9784	3.88947
	19.9771	26.6888	7.53432
	31.0153	47.3871	4.20352
	19.5619		28.813
	7.60135		9.18077
	5.75569		10.0511
	34.8334		9.64208
	18.3692
	5.47421
	15.7211
	18.0831
	16.4158
	19.5065
	1.03012
	26.9228
	3.17199
	23.8939
mean	16.3679	38.5968	10.7476
SEM	10.8449	25.8088	8.41258
