# Supplementary material for: The vascular niche controls Drosophila hematopoiesis via fibroblast growth factor signaling
Source: eLife. 2021 Jan 4;10:e64672. doi: 10.7554/eLife.64672 (PMC7781598; doi:10.7554/eLife.64672)
Supplement: Figure 5—figure supplement 1—source data 1. [file elife-64672-fig5-figsupp1-data1.xlsx]

## Sheet: sup Fig5c
	dome>	dome> btl-RNAi
	475.83	461.198
	262.4	402.886
	369.115	231.265
	526.937	229.745
	230.825	174.637
	230.876	231.192
	256.188	228.863
	270.062
	233.796
	232.904
	247.038
	240.752
	236.258
	233.924
mean	289.1	280
sem	25.99	40.51

## Sheet: sup Fig5h
	tep4>	tep4> btl-RNAi	tep4> IP3R	tep4> IP3R; btl-RNAi
	13.0138	14.2089	11.7793	12.5856
	7.72952	22.1345	5.52352	10.8252
	9.52685	20.5544	5.4276	1.12695
	6.65046	9.26765	4.96607	2.98508
	6.60913	8.94124	7.82011	18.6002
	13.4868	11.1883	9.71619	10.3407
	10.5914	8.59572	6.29385	2.49365
	12.6746	18.1732	10.1075	2.63729
	10.6887	28.8196	7.70455	1.84358
	9.04549	11.2521	3.40725	13.9019
	12.1081	25.3161	5.1674	10.7262
	7.73185	36.4965	5.75417	3.75248
	12.0783		3.19839	3.44419
	12.695		7.70675	3.43617
			4.0396	7.14619
			13.1876	3.57958
			11.2429	4.53905
			8.42359	3.71394
			14.7428	3.77656
			3.69107	1.60498
			6.34047	1.30516
			12.3045	13.3593
			7.97965	2.22992
			10.1171	2.96556
			3.40436	5.73141
			8.75848	5.25215
			5.76864	7.64134
mean	10.3307	17.9124	7.57679	5.98312
sem	2.44738	8.99156	3.21585	4.65188
