# Supplementary material for: The vascular niche controls Drosophila hematopoiesis via fibroblast growth factor signaling
Source: eLife. 2021 Jan 4;10:e64672. doi: 10.7554/eLife.64672 (PMC7781598; doi:10.7554/eLife.64672)
Supplement: Figure 5—source data 1. [file elife-64672-fig5-data1.xlsx]

## Sheet: Fig5c
	dome>	dome>btl-RNAi
	60.9649	99.2924
	61.7589	133.412
	61.1042	45.7981
	78.0851	29.6087
	47.8708	69.5981
	126.402	246.061
	76.1887	142.459
	578.994	39.2792
	460.083	262.261
	139.496	192.708
	202.921	166.458
	449.211	179.144
	191.613	152.406
	591.569	16.0981
	523.167	300.203
	156.91	395.921
	669.532	33.3754
	769.27	48.7102
	446.348	234.743
	415.085	268.025
	57.0001	83.5456
	68.8864	97.7889
	514.541	76.348
	565.818	57.4101
	89.6889	3.50808
	63.8325	2.02107
	279.504	0.0708872
	345.781	0.0150188
	471.669
	331.084
	424.868
	137.517
	160.729
	658.132
	246.057
	216.641
	238.94
	215.426
	263.804
	18.2571
	44.154
mean	280.949	120.581
SEM	211.374	105.924

## Sheet: Fig5h
	dome>	dome>btl-RNAi	hand>CamKII	hand>CamKII; btl-RNAi
	14.2123	14.7455	16.3128	7.0088
	8.60382	28.4996	19.5325	0
	38.2171	33.2041	0	2.93811
	5.63829	16.4195	3.73425	0
	13.7922	5.11834		15.097
	12.6764	10.7652	19.4353	12.7631
	8.57454	55.4142	11.9173	5.8312
	16.8315	22.9488	8.74496	0.26368
	37.3595	8.6137	8.19684	2.8321
	35.0465	11.2984	3.0507	3.02441
	11.3778	15.2186	4.54286	3.37452
	5.02129	16.9395	4.38251	16.2281
	10.6034	32.8602	20.757	17.5641
	12.7647	11.5988	6.91687	17.1158
	10.759	38.6555	5.56598	8.35346
	23.8964	22.0509	9.22729	3.87848
	13.6391	59.4012	13.1702	4.82294
	19.1409	40.8685	3.38827	8.60337
	15.0802	62.9368	7.19142	3.07305
	11.804	36.1356	12.2219	7.59566
	13.6032	10.2219	8.83816	1.48131
	12.377	20.714	15.274	0.761025
	1.77026	52.8632	7.25344	0.266897
	8.1937	75.3526	31.6212	0.729057
	3.41262	72.5469	11.0873	6.27017
	13.2801	41.907	1.99898	0
	33.8786	13.7515	13.0668
	10.8932	77.0146	12.8846
	12.2225	63.2216	8.95258
	7.24049	13.4834	10.7156
	2.83447	6.56736	18.165
	7.93553	44.7069	5.09064
	6.72143	32.6694	6.18994
	11.672		0.926997
	20.6442		1.91681
mean	14.0491	32.3853	9.77267	5.76447
sem	9.3482	21.8982	6.8071	5.67088

## Sheet: Fig5l
	dome>	dome>sl-RNAi
	5.80864	19.829
	20.2671	25.135
	18.9891	25.1974
	2.32249	8.0278
	1.41865	12.0429
	1.88141	10.1122
	1.05721	9.90831
	0.639085	17.3949
	9.59458	21.0495
	8.73356	9.28194
	11.8845	13.9022
	0.873458	26.1662
	4.93599	24.1179
	6.23282	29.716
	2.14893	26.6634
	6.37961	17.5908
	0.365597	16.7368
	9.88385	21.7993
	10.6386	23.0989
	17.1824	7.22769
	15.0967	9.39888
	13.707	14.504
	16.366	6.31156
	14.808	10.2261
	14.5804	18.2512
	11.2656	18.3048
	14.8073	26.846
		25.6017
		15.8278
		13.1265
mean	8.9581	17.4466
sem	6.31741	6.90962

## Sheet: Fig5m
	white	sl2
	7.29091	27.1754
	5.24434	22.627
	7.4044	34.0495
	9.52287	26.3465
	0.728916	10.7364
	6.21168	21.3349
	5.60381	28.6793
	3.49166	30.4171
	18.1681	37.7018
	14.9841	30.4919
	24.9481	17.3035
	17.733	20.7343
	21.3829	25.1348
	19.0689	19.2569
	11.3416	33.6777
	10.8543	10.0874
	10.2254	15.0942
	14.1266
	14.1358
	9.13399
mean	11.5801	24.1676
sem	6.37867	8.06149

## Sheet: Fig5n
	sl2; dome>	sl2; dome> btlCA
	29.24	22.86
	10.95	11.29
	26.31	11.77
	21.99	10.24
	23.25	10.32
	32.22	1.78
	15.9	6.81
	29.95	14.5
	29.67	14.97
	6.7	16.05
	12.9	22.82
	0.36	21.69
	19.49	16.22
	4.61	3.55
	7.75	15.31
	6.58	5.76
	7.25	26.74
	22.94	33.92
	1.95	44.59
	6.36	6.97
		22.46
mean	15.82	16.22
sem	2.347	2.267
